# Supplementary material
Source: MDPI journal article supplement (https://www.mdpi.com/2313-0105/8/12/271)
Supplement: s1 [file s1]

## Supplementary Information

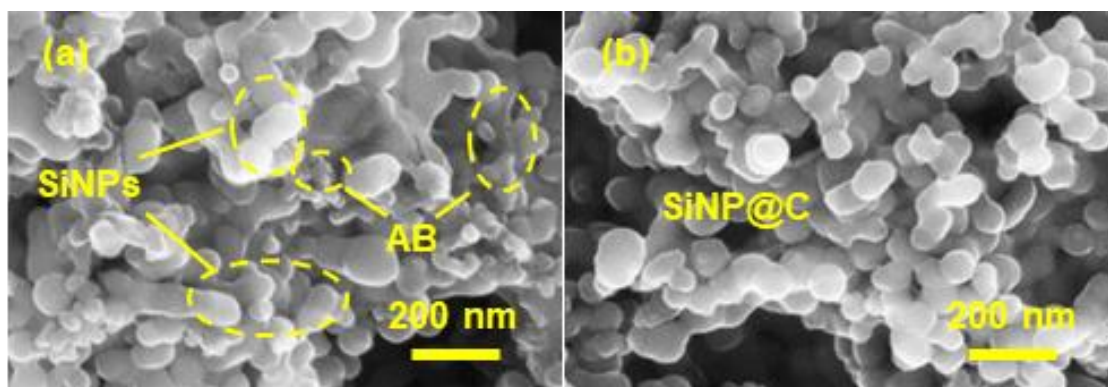

**Figure S1.** The zoomed images of a pristine (a) Si-XG-AB electrode and (b) a Si@C-network electrode.

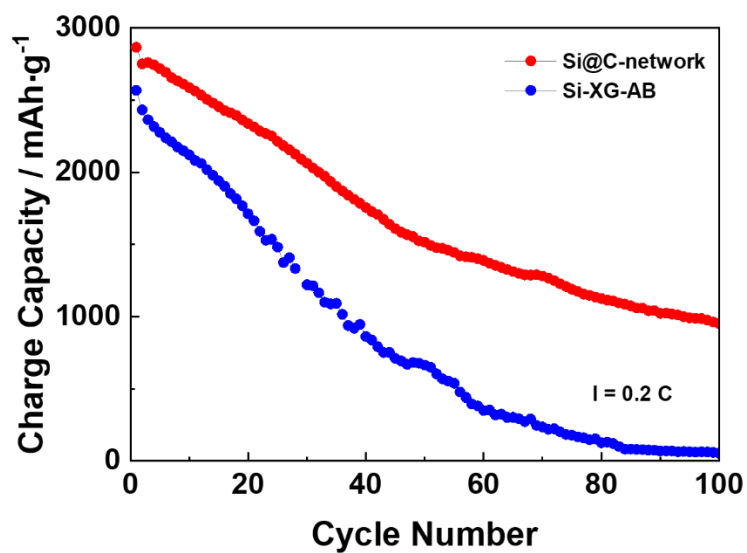

**Figure S2.** The galvanostatic test results of the Si-XG-AB and the Si@C-network electrode at a rate of 0.2 C (1C = 3580 mA·g<sup>-1</sup>) in a 1M LiPF<sub>6</sub>/DMC electrolyte with the initial cycle at 200 mA·g<sup>-1</sup> to activate the electrodes.
